# Supplementary material for: Autophagy dysregulation in Danon disease
Source: PubMed Central journal article supplement (PMC5386379; doi:10.1038/cddis.2016.475), 2017-01-19
Supplement: cddis2016475x2.pdf [file cddis2016475x2.pdf]

**Table S1. Patients' clinical and molecular data**

| Patient | Gender | Age at onset | Age at biopsy | Disease duration | Main clinical features at biopsy                                                                                            | Degree of clinical severity | Genotype               |
|---------|--------|--------------|---------------|------------------|-----------------------------------------------------------------------------------------------------------------------------|-----------------------------|------------------------|
| 1 DD    | M      | 20           | 21            | 1                | Severe hypertrophic cardiomyopathy, severe muscle impairment and atrophy, cardiogenic ascites, cachexia, deceased at age 21 | ++++                        | c.796–797insC, p.fsX7  |
| 2 DD    | M      | 22           | 25            | 3                | Severe hypertrophic cardiomyopathy, moderate muscle impairment, deceased at age 25                                          | +++                         | c.680–701del22, p.fsX8 |
| 3* DD   | M      | 18           | 28            | 10               | Severe hypertrophic cardiomyopathy, moderate muscle impairment, heart transplant at age 34, alive at age 40                 | ++                          | c.294G>A, p.W98X       |
| 4* DD   | F      | 26           | 54            | 28               | Severe hypertrophic cardiomyopathy, mild muscle impairment, heart transplant at age 52, alive at age 61                     | +                           | c.294G>A, p.W98X       |

|         |     |   |    |    |    |                                                    |     |                                       |
|---------|-----|---|----|----|----|----------------------------------------------------|-----|---------------------------------------|
| 5 GSDII | I   | F | 40 | 56 | 16 | Moderate muscle weakness, waddling gait            | ++  | c.-32-13T>G; c.307T>G, p.C103G        |
|         | II  |   |    | 65 | 25 | Severe muscle weakness, walks with a cane, dyspnea | +++ |                                       |
| 6 GSDII | I   | F | 34 | 54 | 20 | Moderate muscle weakness, Gowers sign              | ++  | c.-32-13T>G; c.2219delTG, p.V740fsX55 |
|         | II  |   |    | 60 | 26 | Severe muscle weakness, respiratory insufficiency  | +++ |                                       |
| 7 GSDII | I   | F | 41 | 42 | 1  | Mild muscle weakness, Gowers sign                  | +   | c.-32-13T>G; c.546+1G>T               |
|         | II  |   |    | 48 | 7  | Moderate muscle weakness, loss of Gowers           | ++  |                                       |
| 8 GSDII | I   | M | 18 | 18 | 0  | Asymptomatic hyperCKemia (>1000 U/L)               | +/- | c.546+1G>T, p.L552P; n.d.             |
|         | ERT |   |    | 19 | 1  | Asymptomatic hyperCKemia (>700 U/L)                | +/- |                                       |

I: first biopsy; II: second biopsy; \*: relatives, son and mother; CK: creatine kinase (normal values = 0-200 U/L); n.d.: not determined.
